# Supplementary material for: Evolution of limb bone loading and body size in varanid lizards
Source: Oxford University Press journal article supplement (doi:10.1242/jeb.059345), 2011-08-24
Supplement: jeb059345figs1.pdf [file jeb059345figs1.pdf]

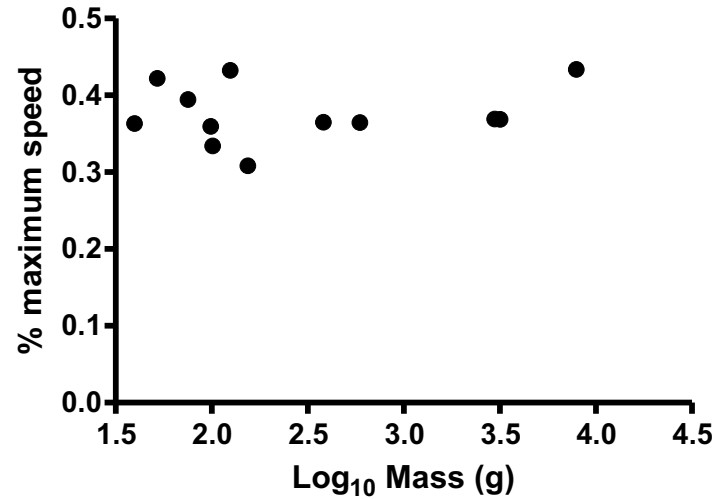

**Figure S1. Plot of mass with the % of maximal speed run during kinematic trials. There was no significant relationship between the % of maximal speed and body mass ( $R^2 = 0.028$ ,  $P = 0.604$ ,  $n = 12$ ).**
