# Supplementary material for: Evolution of limb bone loading and body size in varanid lizards
Source: Oxford University Press journal article supplement (doi:10.1242/jeb.059345), 2011-08-24
Supplement: jeb059345figs2.pdf [file jeb059345figs2.pdf]

### A. 30-45% of maximal speed

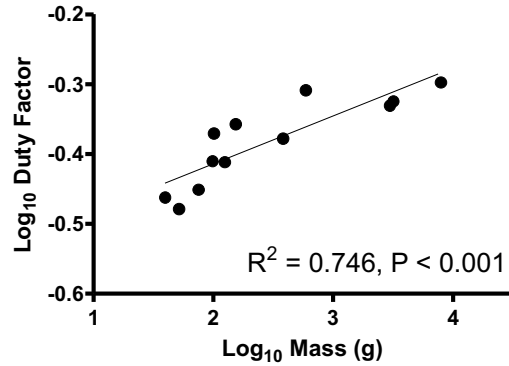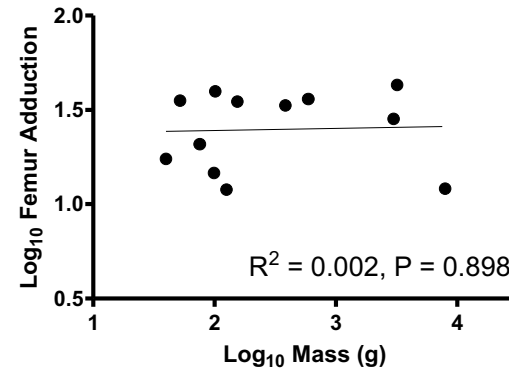

### B. 40-60% of maximal speed

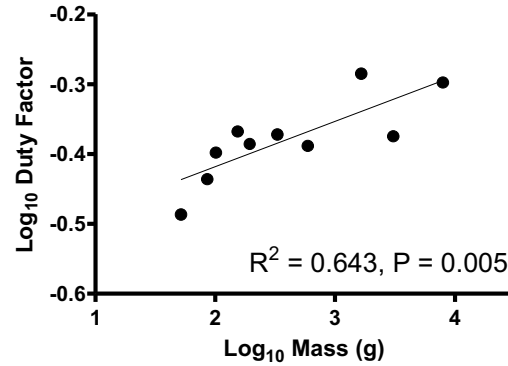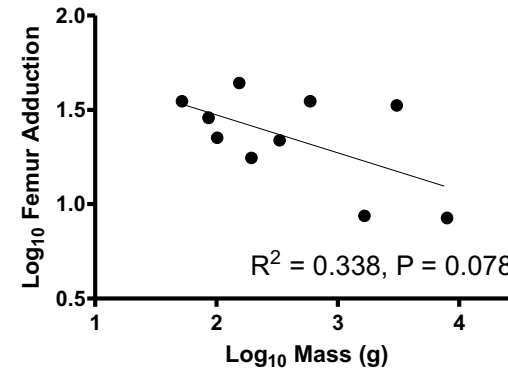

### C. 50-70% of maximal speed

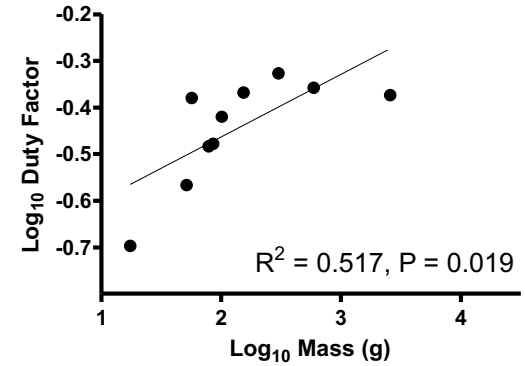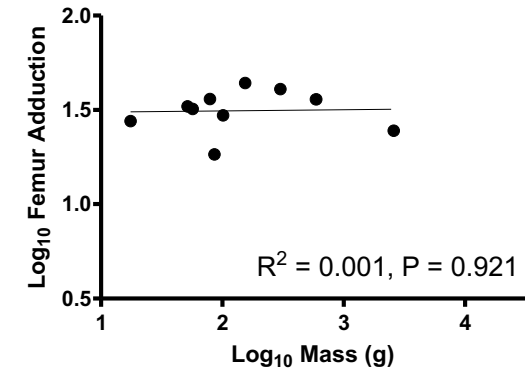

**Figure S2 shows duty factor and femur adduction(depression) from three data sets, A – using strides between 30-45% of maximal speed. B – using strides 40-60% of maximal speed. C – using strides 50-70% of maximal speed. Note the largest size range (and smallest error) is for the 30-45% maximal speed which justifies its use in the study.**
